# Supplementary material for: Investigation of tin, arsenic and lead concentrations in prehistoric arrowheads
Source: Royal Society of Chemistry journal article supplement (doi:10.1039/c3ja50154j), 2013-01-01
Supplement: c3ja50154j.pdf [file c3ja50154j.pdf]

Analyzed arrowheads sorted by burial sites  
discovered in Jabal al-Buhais, Sharjah

| <b>Sample No</b> | <b>Sample Code</b> | <b>Burial site</b> |
|------------------|--------------------|--------------------|
| 1                | Bhs 702            | 12                 |
| 2                | Bhs 703            | 12                 |
| 3                | Bhs 705            | 12                 |
| 4                | Bhs 719            | 20                 |
| 5                | Exs 381            | 27                 |
| 6                | Bhs 1194           | 51                 |
| 7                | Bhs 1200           | 51                 |
| 8                | Bhs 1201           | 51                 |
| 9                | Bhs 1202           | 51                 |
| 10               | Bhs 1203           | 51                 |
| 11               | Bhs 1204           | 51                 |
| 12               | Bhs 1206           | 51                 |
| 13               | Bhs 1208           | 51                 |
| 14               | Bhs 1210           | 51                 |
| 15               | Bhs 1212           | 51                 |
| 16               | Bhs 1214           | 51                 |
| 17               | Bhs 1217           | 51                 |
| 18               | Bhs 1218           | 51                 |
| 19               | Bhs 1219           | 51                 |
| 20               | Bhs 1220           | 51                 |
| 21               | Bhs 1221           | 51                 |
| 22               | Bhs 1222           | 51                 |
| 23               | Bhs 1223           | 51                 |
| 24               | Bhs 1227           | 51                 |
| 25               | Bhs 693            | 64                 |
| 26               | Bhs 694            | 64                 |
| 27               | Bhs 696            | 64                 |
| 28               | Bhs 727            | 77                 |
| 29               | Bhs 783            | 78                 |
| 30               | Bhs 789            | 78                 |
| 31               | Bhs 809            | 78                 |
| 32               | Bhs 837            | 78                 |
| 33               | Bhs 885            | 78                 |
| 34               | Bhs 886            | 78                 |
| 35               | Bhs 946            | 84                 |
| 36               | Bhs 950            | 84                 |
| 37               | Exs 347            | 85                 |
| 38               | Exs 351            | 85                 |
| 39               | Exs 352            | 85                 |
